# Supplementary material for: BMP2 induces hMSC osteogenesis and matrix remodeling
Source: PubMed Central journal article supplement — Mol Med Rep. 2020 Dec 8;23(2):125. doi: 10.3892/mmr.2020.11764 (PMC7751477; doi:10.3892/mmr.2020.11764), 2020-12-08
Supplement: Supplementary_Data.pdf [file Supplementary_Data.pdf]

Table S1. Relative protein quantification-significantly changing protein candidates across HCPB: HCP groups.

| N    | Accession              | Name                                                                                            | Diff_state | HCPB:HCP    | PVal        |
|------|------------------------|-------------------------------------------------------------------------------------------------|------------|-------------|-------------|
| 3504 | sp Q9Y4X5 ARI1_HUMAN   | E3 ubiquitin-protein ligase ARIH1 OS=Homo sapiens OX=9606 GN=ARIH1 PE=1 SV=2                    | Up         | 4.465193071 | 0.03033996  |
| 3241 | sp O95453 PARN_HUMAN   | Poly(A)-specific ribonuclease PARN OS=Homo sapiens OX=9606 GN=PARN PE=1 SV=1                    | Up         | 4.33971043  | 0.036374711 |
| 3539 | sp Q52LW3 IRHG29_HUMAN | Rho GTPase-activating protein 29 OS=Homo sapiens OX=9606 GN=ARHGAP29 PE=1 SV=2                  | Up         | 3.785179946 | 0.036496479 |
| 1581 | sp P09486 SPRC_HUMAN   | SPARC OS=Homo sapiens OX=9606 GN=SPARC PE=1 SV=1                                                | Up         | 3.592328395 | 0.008617558 |
| 2994 | sp P19022 CADH2_HUMAN  | Cadherin-2 OS=Homo sapiens OX=9606 GN=CADH2 PE=1 SV=4                                           | Up         | 3.399487808 | 0.002232651 |
| 788  | sp Q9Y376 CAB39_HUMAN  | Calcium-binding protein 39 OS=Homo sapiens OX=9606 GN=CAB39 PE=1 SV=1                           | Up         | 3.368532519 | 0.008543517 |
| 1764 | sp O75348 VATG1_HUMAN  | V-type proton ATPase subunit G 1 OS=Homo sapiens OX=9606 GN=ATP6V1G1 PE=1 SV=3                  | Up         | 3.345915323 | 0.030336071 |
| 2048 | sp Q8N3D4 EHIL1_HUMAN  | EH domain-binding protein 1-like protein 1 OS=Homo sapiens OX=9606 GN=EHBP1L1 PE=1 SV=2         | Up         | 3.32242134  | 0.002160381 |
| 1389 | sp Q969U7 PSMG2_HUMAN  | Proteasome assembly chaperone 2 OS=Homo sapiens OX=9606 GN=PSMG2 PE=1 SV=1                      | Up         | 3.181178365 | 0.038866039 |
| 963  | sp P68032 ACTC_HUMAN   | Actin, alpha cardiac muscle 1 OS=Homo sapiens OX=9606 GN=ACTC1 PE=1 SV=1                        | Up         | 3.09537324  | 0.03095394  |
| 30   | sp P13639 EF2_HUMAN    | Elongation factor 2 OS=Homo sapiens OX=9606 GN=EEF2 PE=1 SV=4                                   | Up         | 2.981714873 | 3.28616E-07 |
| 2596 | sp Q9H4A6 GOLP3_HUMAN  | Golgi phosphoprotein 3 OS=Homo sapiens OX=9606 GN=GOLPH3 PE=1 SV=1                              | Up         | 2.887284104 | 0.032723591 |
| 61   | sp P50454 SERPH_HUMAN  | Serpin H1 OS=Homo sapiens OX=9606 GN=SERPINH1 PE=1 SV=2                                         | Up         | 2.750424247 | 0.000111161 |
| 399  | sp P49591 ISYSC_HUMAN  | Serine--tRNA ligase, cytoplasmic OS=Homo sapiens OX=9606 GN=SARS PE=1 SV=3                      | Up         | 2.742290385 | 0.000539484 |
| 2619 | sp Q13671 RIN1_HUMAN   | Ras and Rab interactor 1 OS=Homo sapiens OX=9606 GN=RIN1 PE=1 SV=4                              | Up         | 2.686647108 | 0.002886786 |
| 415  | sp P08243 ASNS_HUMAN   | Asparagine synthetase [glutamine-hydrolyzing] OS=Homo sapiens OX=9606 GN=ASNS PE=1 SV=4         | Up         | 2.681109375 | 0.01116749  |
| 1206 | sp P00492 HPRT_HUMAN   | Hypoxanthine-guanine phosphoribosyltransferase OS=Homo sapiens OX=9606 GN=HPRT1 PE=1 SV=2       | Up         | 2.487120475 | 0.03574096  |
| 222  | sp P08123 CO1A2_HUMAN  | Collagen alpha-2(I) chain OS=Homo sapiens OX=9606 GN=COL1A2 PE=1 SV=7                           | Up         | 2.483058926 | 0.000129648 |
| 333  | sp Q14573 ITPR3_HUMAN  | Inositol 1,4,5-trisphosphate receptor type 3 OS=Homo sapiens OX=9606 GN=ITPR3 PE=1 SV=2         | Up         | 2.380801663 | 0.000131943 |
| 40   | sp P07355 ANXA2_HUMAN  | Annexin A2 OS=Homo sapiens OX=9606 GN=ANXA2 PE=1 SV=2                                           | Up         | 2.373278757 | 0.000234437 |
| 156  | sp O00410 IPO5_HUMAN   | Importin-5 OS=Homo sapiens OX=9606 GN=IPO5 PE=1 SV=4                                            | Up         | 2.341550028 | 0.006258828 |
| 401  | sp P08240 SRPRA_HUMAN  | Signal recognition particle receptor subunit alpha OS=Homo sapiens OX=9606 GN=SRPRA PE=1 SV=2   | Up         | 2.292651733 | 0.01109283  |
| 71   | sp P07814 SYEP_HUMAN   | Bifunctional glutamate/proline--tRNA ligase OS=Homo sapiens OX=9606 GN=EPRS PE=1 SV=5           | Up         | 2.268764189 | 4.78009E-05 |
| 266  | sp Q9Y617 SERC_HUMAN   | Phosphoserine aminotransferase OS=Homo sapiens OX=9606 GN=PSAT1 PE=1 SV=2                       | Up         | 2.246177703 | 0.001910891 |
| 1015 | sp P06748 NPM_HUMAN    | Nucleophosmin OS=Homo sapiens OX=9606 GN=NPM1 PE=1 SV=2                                         | Up         | 2.236765971 | 0.036769491 |
| 142  | sp P41250 GARS_HUMAN   | Glycine--tRNA ligase OS=Homo sapiens OX=9606 GN=GARS PE=1 SV=3                                  | Up         | 2.23648241  | 0.045942228 |
| 152  | sp P54886 P5CS_HUMAN   | Delta-1-pyrroline-5-carboxylate synthase OS=Homo sapiens OX=9606 GN=ALDH18A1 PE=1 SV=2          | Up         | 2.233110517 | 0.029873351 |
| 179  | sp O43175 SERA_HUMAN   | D-3-phosphoglycerate dehydrogenase OS=Homo sapiens OX=9606 GN=PHGDH PE=1 SV=4                   | Up         | 2.200972257 | 0.01346197  |
| 388  | sp P04181 OAT_HUMAN    | Ornithine aminotransferase, mitochondrial OS=Homo sapiens OX=9606 GN=OAT PE=1 SV=1              | Up         | 2.146674018 | 0.007613577 |
| 100  | sp Q14152 EIF3A_HUMAN  | Eukaryotic translation initiation factor 3 subunit A OS=Homo sapiens OX=9606 GN=EIF3A PE=1 SV=1 | Up         | 2.143169708 | 0.008356921 |
| 34   | sp P11021 BIP_HUMAN    | Endoplasmic reticulum chaperone BiP OS=Homo sapiens OX=9606 GN=HSPA5 PE=1 SV=2                  | Up         | 2.140430266 | 0.001238583 |
| 508  | sp Q96D15 RCN3_HUMAN   | Reticulocalbin-3 OS=Homo sapiens OX=9606 GN=RCN3 PE=1 SV=1                                      | Up         | 2.130955143 | 0.002692377 |
| 711  | sp Q96AG4 LRC59_HUMAN  | Leucine-rich repeat-containing protein 59 OS=Homo sapiens OX=9606 GN=LRRRC59 PE=1 SV=1          | Up         | 2.122447588 | 0.0120502   |
| 67   | sp P52272 HNRPM_HUMAN  | Heterogeneous nuclear ribonucleoprotein M OS=Homo sapiens OX=9606 GN=HNRNPM PE=1 SV=3           | Up         | 2.121505309 | 0.02518332  |

Table SI. Continued.

| N    | Accession              | Name                                                                                                                  | Diff_state | HCPB:HCP    | PVal        |
|------|------------------------|-----------------------------------------------------------------------------------------------------------------------|------------|-------------|-------------|
| 17   | spIQ00610 CLH1_HUMAN   | Clathrin heavy chain 1 OS=Homo sapiens OX=9606 GN=CLTC PE=1 SV=5                                                      | Up         | 2.074931497 | 0.000330528 |
| 1238 | spIP42766 RL35_HUMAN   | 60S ribosomal protein L35 OS=Homo sapiens OX=9606 GN=RPL35 PE=1 SV=2                                                  | Up         | 2.059539679 | 0.024340579 |
| 371  | spIQ16658 FSCN1_HUMAN  | Fascin OS=Homo sapiens OX=9606 GN=FSCN1 PE=1 SV=3                                                                     | Up         | 2.043557773 | 0.0151894   |
| 873  | spIP0C0L4 CO4A_HUMAN   | Complement C4-A OS=Homo sapiens OX=9606 GN=C4A PE=1 SV=2                                                              | Up         | 2.020110296 | 0.008506326 |
| 162  | spIP27708 PYR1_HUMAN   | CAD protein OS=Homo sapiens OX=9606 GN=CAD PE=1 SV=3                                                                  | Up         | 2.016854025 | 0.0194874   |
| 681  | spIP28066 PSA5_HUMAN   | Proteasome subunit alpha type-5 OS=Homo sapiens OX=9606 GN=PSMA5 PE=1 SV=3                                            | Up         | 2.001532777 | 0.037744731 |
| 1287 | spIQ14137 BOP1_HUMAN   | Ribosome biogenesis protein BOP1 OS=Homo sapiens OX=9606 GN=BOP1 PE=1 SV=2                                            | Up         | 1.978508247 | 0.048012178 |
| 286  | spIP45974 UBP5_HUMAN   | Ubiquitin carboxyl-terminal hydrolase 5 OS=Homo sapiens OX=9606 GN=USP5 PE=1 SV=2                                     | Up         | 1.952135479 | 0.01704452  |
| 46   | spIP11142 HSP7C_HUMAN  | Heat shock cognate 71 kDa protein OS=Homo sapiens OX=9606 GN=HSPA8 PE=1 SV=1                                          | Up         | 1.944531324 | 0.000415664 |
| 470  | spIO60271 JIP4_HUMAN   | C-Jun-amino-terminal kinase-interacting protein 4 OS=Homo sapiens OX=9606 GN=SPAG9 PE=1 SV=4                          | Up         | 1.936912553 | 0.004391838 |
| 846  | spIP46379 BAG6_HUMAN   | Large proline-rich protein BAG6 OS=Homo sapiens OX=9606 GN=BAG6 PE=1 SV=2                                             | Up         | 1.930431694 | 0.046615541 |
| 2546 | spIO43294 TGFB1_HUMAN  | Transforming growth factor beta-1-induced transcript 1 protein OS=Homo sapiens OX=9606 GN=TGFB1 PE=1 SV=2             | Up         | 1.92948662  | 0.037442591 |
| 402  | spIO15460 P4HA2_HUMAN  | Prolyl 4-hydroxylase subunit alpha-2 OS=Homo sapiens OX=9606 GN=P4HA2 PE=1 SV=1                                       | Up         | 1.924992442 | 0.005524759 |
| 29   | spIP08133 ANXA6_HUMAN  | Annexin A6 OS=Homo sapiens OX=9606 GN=ANXA6 PE=1 SV=3                                                                 | Up         | 1.916717273 | 0.00013933  |
| 324  | spIP18669 PGAM1_HUMAN  | Phosphoglycerate mutase 1 OS=Homo sapiens OX=9606 GN=PGAM1 PE=1 SV=2                                                  | Up         | 1.90583672  | 0.000641185 |
| 716  | spIQ13045 FLJ11_HUMAN  | Protein flightless-1 homolog OS=Homo sapiens OX=9606 GN=FLJ11 PE=1 SV=2                                               | Up         | 1.894038832 | 0.029716261 |
| 215  | spIQ92598 HS105_HUMAN  | Heat shock protein 105 kDa OS=Homo sapiens OX=9606 GN=HSPH1 PE=1 SV=1                                                 | Up         | 1.885942366 | 0.000317772 |
| 1505 | spIQ9Y281 COF2_HUMAN   | Cofilin-2 OS=Homo sapiens OX=9606 GN=CFL2 PE=1 SV=1                                                                   | Up         | 1.885823962 | 0.01342565  |
| 39   | spIQ00341 VIGLN_HUMAN  | Vigilin OS=Homo sapiens OX=9606 GN=HDLBP PE=1 SV=2                                                                    | Up         | 1.87064509  | 0.000212131 |
| 238  | spIO60568 PLOD3_HUMAN  | Multifunctional procollagen lysine hydroxylase and glycosyltransferase LH3 OS=Homo sapiens OX=9606 GN=PLOD3 PE=1 SV=1 | Up         | 1.869750108 | 0.0386764   |
| 382  | spIP08865 IRSSA_HUMAN  | 40S ribosomal protein SA OS=Homo sapiens OX=9606 GN=RPSA PE=1 SV=4                                                    | Up         | 1.838133027 | 0.03054031  |
| 202  | spIQ14974 IMB1_HUMAN   | Importin subunit beta-1 OS=Homo sapiens OX=9606 GN=KPNB1 PE=1 SV=2                                                    | Up         | 1.825455535 | 0.01483602  |
| 81   | spIP41252 SYIC_HUMAN   | Isoleucine--tRNA ligase, cytoplasmic OS=Homo sapiens OX=9606 GN=IARS PE=1 SV=2                                        | Up         | 1.809601146 | 0.001500391 |
| 986  | spIP46776 RL27A_HUMAN  | 60S ribosomal protein L27a OS=Homo sapiens OX=9606 GN=RPL27A PE=1 SV=2                                                | Up         | 1.808654859 | 0.039487489 |
| 41   | spIQ9P2E9 RRBP1_HUMAN  | Ribosome-binding protein 1 OS=Homo sapiens OX=9606 GN=RRBP1 PE=1 SV=5                                                 | Up         | 1.797102152 | 0.005081768 |
| 130  | spIP50991 ITCPD_HUMAN  | T-complex protein 1 subunit delta OS=Homo sapiens OX=9606 GN=CC14 PE=1 SV=4                                           | Up         | 1.787265689 | 0.01191205  |
| 883  | spIQ13085 ACACA_HUMAN  | Acetyl-CoA carboxylase 1 OS=Homo sapiens OX=9606 GN=ACACA PE=1 SV=2                                                   | Up         | 1.774891602 | 0.00026183  |
| 7    | spIQ9Y490 TLN1_HUMAN   | Talin-1 OS=Homo sapiens OX=9606 GN=TLN1 PE=1 SV=3                                                                     | Up         | 1.773908912 | 0.000269464 |
| 144  | spIP54136 SYRC_HUMAN   | Arginine--tRNA ligase, cytoplasmic OS=Homo sapiens OX=9606 GN=RARS PE=1 SV=2                                          | Up         | 1.768942563 | 0.000154463 |
| 15   | spIP12814 ACTN1_HUMAN  | Alpha-actinin-1 OS=Homo sapiens OX=9606 GN=ACTN1 PE=1 SV=2                                                            | Up         | 1.765691286 | 0.000171666 |
| 442  | spIP02452 CO1A1_HUMAN  | Collagen alpha-1(I) chain OS=Homo sapiens OX=9606 GN=COL1A1 PE=1 SV=5                                                 | Up         | 1.759943729 | 0.003543627 |
| 47   | spIP68104 EEF1A1_HUMAN | Elongation factor 1--alpha 1 OS=Homo sapiens OX=9606 GN=EEF1A1 PE=1 SV=1                                              | Up         | 1.757113969 | 0.003833581 |
| 749  | spIP20908 CO5A1_HUMAN  | Collagen alpha-1(V) chain OS=Homo sapiens OX=9606 GN=COL5A1 PE=1 SV=3                                                 | Up         | 1.752259064 | 0.01469139  |
| 143  | spIP08238 HSP90B_HUMAN | Heat shock protein HSP 90-beta OS=Homo sapiens OX=9606 GN=HSP90AB1 PE=1 SV=4                                          | Up         | 1.714496131 | 0.01279122  |

Table SI. Continued.

| N    | Accession              | Name                                                                                                                     | Diff_state | HCPB:HCP    | PVal        |
|------|------------------------|--------------------------------------------------------------------------------------------------------------------------|------------|-------------|-------------|
| 867  | sp Q13740 CDI66_HUMAN  | CDI66 antigen OS=Homo sapiens OX=9606 GN=ALCAM PE=1 SV=2                                                                 | Up         | 1.712335365 | 0.01529032  |
| 1074 | sp O95552 ATG7_HUMAN   | Ubiquitin-like modifier-activating enzyme ATG7 OS=Homo sapiens OX=9606 GN=ATG7 PE=1 SV=1                                 | Up         | 1.700171657 | 0.036438908 |
| 573  | sp P62277 IRS13_HUMAN  | 40S ribosomal protein S13 OS=Homo sapiens OX=9606 GN=RPS13 PE=1 SV=2                                                     | Up         | 1.698202853 | 0.000661186 |
| 334  | sp Q15746 MYLK_HUMAN   | Myosin light chain kinase, smooth muscle OS=Homo sapiens OX=9606 GN=MYLK PE=1 SV=4                                       | Up         | 1.6954145   | 0.036581788 |
| 304  | sp P07737 PROF1_HUMAN  | Profilin-1 OS=Homo sapiens OX=9606 GN=PFN1 PE=1 SV=2                                                                     | Up         | 1.684753908 | 0.009641522 |
| 35   | sp P07237 PDIA1_HUMAN  | Protein disulfide-isomerase OS=Homo sapiens OX=9606 GN=P4HB PE=1 SV=3                                                    | Up         | 1.675353628 | 0.002737582 |
| 151  | sp Q9BSJ8 ESYT1_HUMAN  | Extended synaptotagmin-1 OS=Homo sapiens OX=9606 GN=ESYT1 PE=1 SV=1                                                      | Up         | 1.670485115 | 0.02964364  |
| 577  | sp O43854 EDIL3_HUMAN  | EGF-like repeat and discoidin I-like domain-containing protein 3 OS=Homo sapiens OX=9606 GN=EDIL3 PE=1 SV=1              | Up         | 1.663778977 | 0.025474651 |
| 781  | sp Q14669 TRIPC_HUMAN  | E3 ubiquitin-protein ligase TRIP12 OS=Homo sapiens OX=9606 GN=TRIP12 PE=1 SV=1                                           | Up         | 1.662392131 | 0.03049555  |
| 271  | sp P06756 ITAV_HUMAN   | Integrin alpha-V OS=Homo sapiens OX=9606 GN=ITGAV PE=1 SV=2                                                              | Up         | 1.655100884 | 0.027857309 |
| 121  | sp P13674 P4HA1_HUMAN  | Prolyl 4-hydroxylase subunit alpha-1 OS=Homo sapiens OX=9606 GN=P4HA1 PE=1 SV=2                                          | Up         | 1.65482054  | 0.01844353  |
| 291  | sp Q15942 ZYX_HUMAN    | Zyxin OS=Homo sapiens OX=9606 GN=ZYX PE=1 SV=1                                                                           | Up         | 1.647344956 | 0.002977726 |
| 612  | sp P39656 OIST48_HUMAN | Dolichyl-diphosphooligosaccharide--protein glycosyltransferase 48 kDa subunit OS=Homo sapiens OX=9606 GN=DDOST PE=1 SV=4 | Up         | 1.645677787 | 0.006203016 |
| 361  | sp Q9C0C2 TB182_HUMAN  | 182 kDa tankyrase-1-binding protein OS=Homo sapiens OX=9606 GN=TNKS1BP1 PE=1 SV=4                                        | Up         | 1.645222997 | 0.034888241 |
| 2583 | sp Q13151 IROA0_HUMAN  | Heterogeneous nuclear ribonucleoprotein A0 OS=Homo sapiens OX=9606 GN=HNRNPA0 PE=1 SV=1                                  | Up         | 1.642665624 | 0.04536942  |
| 1770 | sp O95219 SNX4_HUMAN   | Sorting nexin-4 OS=Homo sapiens OX=9606 GN=SNX4 PE=1 SV=1                                                                | Up         | 1.622703645 | 0.026243551 |
| 6    | sp P21333 FLNA_HUMAN   | Filamin-A OS=Homo sapiens OX=9606 GN=FLNA PE=1 SV=4                                                                      | Up         | 1.604018752 | 7.40906E-06 |
| 967  | sp Q14157 UBP2L_HUMAN  | Ubiquitin-associated protein 2-like OS=Homo sapiens OX=9606 GN=UBAP2L PE=1 SV=2                                          | Up         | 1.596111395 | 0.018741591 |
| 38   | sp P53621 COPA_HUMAN   | Coatmer subunit alpha OS=Homo sapiens OX=9606 GN=COPA PE=1 SV=2                                                          | Up         | 1.59300121  | 0.01806823  |
| 310  | sp P12270 TPR_HUMAN    | Nucleoprotein TPR OS=Homo sapiens OX=9606 GN=TPR PE=1 SV=3                                                               | Up         | 1.586102033 | 0.01341254  |
| 412  | sp Q07866 KLC1_HUMAN   | Kinesin light chain 1 OS=Homo sapiens OX=9606 GN=KLC1 PE=1 SV=2                                                          | Up         | 1.583642929 | 0.017585261 |
| 315  | sp Q92538 GBF1_HUMAN   | Golgi-specific brefeldin A-resistance guanine nucleotide exchange factor 1 OS=Homo sapiens OX=9606 GN=GBF1 PE=1 SV=2     | Up         | 1.583525452 | 0.01378039  |
| 1400 | sp O43172 PRP4_HUMAN   | U4/U6 small nuclear ribonucleoprotein Prp4 OS=Homo sapiens OX=9606 GN=PRPF4 PE=1 SV=2                                    | Up         | 1.580183614 | 0.01483686  |
| 63   | sp P46821 MAP1B_HUMAN  | Microtubule-associated protein 1B OS=Homo sapiens OX=9606 GN=MAP1B PE=1 SV=2                                             | Up         | 1.57357181  | 0.000593537 |
| 2237 | sp P42574 CASP3_HUMAN  | Caspase-3 OS=Homo sapiens OX=9606 GN=CASP3 PE=1 SV=2                                                                     | Up         | 1.570808065 | 0.033126961 |
| 1864 | sp O15498 YKT6_HUMAN   | Synaptobrevin homolog YKT6 OS=Homo sapiens OX=9606 GN=YKT6 PE=1 SV=1                                                     | Up         | 1.569206833 | 0.03797454  |
| 3    | sp P35579 MYH9_HUMAN   | Myosin-9 OS=Homo sapiens OX=9606 GN=MYH9 PE=1 SV=4                                                                       | Up         | 1.568001451 | 4.502E-07   |
| 92   | sp P11940 PABP1_HUMAN  | Polyadenylate-binding protein 1 OS=Homo sapiens OX=9606 GN=PABPC1 PE=1 SV=2                                              | Up         | 1.566812494 | 0.03755872  |
| 476  | sp P55884 EIF3B_HUMAN  | Eukaryotic translation initiation factor 3 subunit B OS=Homo sapiens OX=9606 GN=EIF3B PE=1 SV=3                          | Up         | 1.566410303 | 0.020350071 |
| 506  | sp O14579 COPE_HUMAN   | Coatmer subunit epsilon OS=Homo sapiens OX=9606 GN=COPE PE=1 SV=3                                                        | Up         | 1.55570423  | 0.032848839 |
| 1421 | sp P07942 LAMB1_HUMAN  | Laminin subunit beta-1 OS=Homo sapiens OX=9606 GN=LAMB1 PE=1 SV=2                                                        | Up         | 1.555686943 | 0.049465939 |
| 210  | sp Q8NBS9 TXND5_HUMAN  | Thioredoxin domain-containing protein 5 OS=Homo sapiens OX=9606 GN=TXND5 PE=1 SV=2                                       | Up         | 1.553720856 | 0.021255109 |

Table SI. Continued.

| N    | Accession             | Name                                                                                                                           | Diff_state | HCPB:HCP    | PVal        |
|------|-----------------------|--------------------------------------------------------------------------------------------------------------------------------|------------|-------------|-------------|
| 268  | spIP301532AAA_HUMAN   | Serine/threonine-protein phosphatase 2A 65 kDa regulatory subunit A alpha isoform OS=Homo sapiens OX=9606 GN=PPP2R1A PE=1 SV=4 | Up         | 1.54839567  | 0.022408821 |
| 96   | spIQ02809PLOD1_HUMAN  | Collagen-lysine,2-oxoglutarate 5-dioxygenase 1 OS=Homo sapiens OX=9606 GN=PLOD1 PE=1 SV=2                                      | Up         | 1.548103343 | 0.006172498 |
| 262  | spIP37802TAGL2_HUMAN  | Transgelin-2 OS=Homo sapiens OX=9606 GN=TAGLN2 PE=1 SV=3                                                                       | Up         | 1.542744626 | 0.01310666  |
| 31   | spIP02545ILMNA_HUMAN  | Prelamin-A/C OS=Homo sapiens OX=9606 GN=LMNA PE=1 SV=1                                                                         | Up         | 1.542598716 | 0.003808074 |
| 112  | spIP26640SYVC_HUMAN   | Valine--tRNA ligase OS=Homo sapiens OX=9606 GN=VARS PE=1 SV=4                                                                  | Up         | 1.538191305 | 0.038797311 |
| 66   | spIQ04637IIF4G1_HUMAN | Eukaryotic translation initiation factor 4 gamma 1 OS=Homo sapiens OX=9606 GN=EIF4G1 PE=1 SV=4                                 | Up         | 1.535833661 | 0.01118684  |
| 122  | spIO60763IUSO1_HUMAN  | General vesicular transport factor p115 OS=Homo sapiens OX=9606 GN=USO1 PE=1 SV=2                                              | Up         | 1.522839859 | 0.01677626  |
| 51   | spIQ14697IGANAB_HUMAN | Neutral alpha-glucosidase AB OS=Homo sapiens OX=9606 GN=GANAB PE=1 SV=3                                                        | Up         | 1.512628788 | 0.002875937 |
| 83   | spIQ8WW1ILMO7_HUMAN   | LIM domain only protein 7 OS=Homo sapiens OX=9606 GN=LMO7 PE=1 SV=3                                                            | Up         | 1.507514584 | 0.00285582  |
| 86   | spIP08758IANXA5_HUMAN | Annexin A5 OS=Homo sapiens OX=9606 GN=ANXA5 PE=1 SV=2                                                                          | Up         | 1.481465968 | 0.019104769 |
| 91   | spIQ01995TAGL_HUMAN   | Transgelin OS=Homo sapiens OX=9606 GN=TAGLN PE=1 SV=4                                                                          | Up         | 1.471149514 | 0.001285047 |
| 301  | spIP15924IDESP_HUMAN  | Desmoplakin OS=Homo sapiens OX=9606 GN=DSP PE=1 SV=3                                                                           | Up         | 1.468830725 | 0.03446468  |
| 49   | spIQ15075IEEA1_HUMAN  | Early endosome antigen 1 OS=Homo sapiens OX=9606 GN=EEA1 PE=1 SV=2                                                             | Up         | 1.468806843 | 0.0248676   |
| 13   | spIQ01082ISPTB2_HUMAN | Spectrin beta chain, non-erythrocytic 1 OS=Homo sapiens OX=9606 GN=SPTBN1 PE=1 SV=2                                            | Up         | 1.467929562 | 0.026767701 |
| 259  | spIP61247IRS3A_HUMAN  | 40S ribosomal protein S3a OS=Homo sapiens OX=9606 GN=RPS3A PE=1 SV=2                                                           | Up         | 1.461952213 | 0.02243693  |
| 1392 | spIQ9BYD1IRM13_HUMAN  | 39S ribosomal protein L13, mitochondrial OS=Homo sapiens OX=9606 GN=MRPL13 PE=1 SV=1                                           | Up         | 1.46032518  | 0.008638367 |
| 106  | spIQ13200IPSM2_HUMAN  | 26S proteasome non-ATPase regulatory subunit 2 OS=Homo sapiens OX=9606 GN=PSMD2 PE=1 SV=3                                      | Up         | 1.457121439 | 0.026966641 |
| 365  | spIP23526ISAHH_HUMAN  | Adenosylhomocysteinase OS=Homo sapiens OX=9606 GN=AHCY PE=1 SV=4                                                               | Up         | 1.45519293  | 0.03089013  |
| 568  | spIQ16222IUAP1_HUMAN  | UDP-N-acetylhexosamine pyrophosphorylase OS=Homo sapiens OX=9606 GN=UAP1 PE=1 SV=3                                             | Up         | 1.452013875 | 0.046447251 |
| 3348 | spIQ9Y496IKIF3A_HUMAN | Kinesin-like protein KIF3A OS=Homo sapiens OX=9606 GN=KIF3A PE=1 SV=4                                                          | Up         | 1.448864602 | 0.037362389 |
| 147  | spIQ9H4M9IEHDI_HUMAN  | EH domain-containing protein 1 OS=Homo sapiens OX=9606 GN=EHD1 PE=1 SV=2                                                       | Up         | 1.438589395 | 0.032502089 |
| 790  | spIQ8W7W3ICOG1_HUMAN  | Conserved oligomeric Golgi complex subunit 1 OS=Homo sapiens OX=9606 GN=COG1 PE=1 SV=1                                         | Up         | 1.433778223 | 0.038107261 |
| 239  | spIP47897ISYQ_HUMAN   | Glutamine--tRNA ligase OS=Homo sapiens OX=9606 GN=QARS PE=1 SV=1                                                               | Up         | 1.433250806 | 0.022754921 |
| 604  | spIQ9UQ35ISRRM2_HUMAN | Serine/arginine repetitive matrix protein 2 OS=Homo sapiens OX=9606 GN=SRRM2 PE=1 SV=2                                         | Up         | 1.430206522 | 0.008991379 |
| 2317 | spIQ99996IAKAP9_HUMAN | A-kinase anchor protein 9 OS=Homo sapiens OX=9606 GN=AKAP9 PE=1 SV=4                                                           | Up         | 1.425102368 | 0.002512239 |
| 1283 | spIQ13442IHAP28_HUMAN | 28 kDa heat- and acid-stable phosphoprotein OS=Homo sapiens OX=9606 GN=HSP28 PE=1 SV=1                                         | Up         | 1.424958298 | 0.01004677  |
| 320  | spIP48637IGSHB_HUMAN  | Glutathione synthetase OS=Homo sapiens OX=9606 GN=GSS PE=1 SV=1                                                                | Up         | 1.419173119 | 0.038509209 |
| 705  | spIP54802IANAG_HUMAN  | Alpha-N-acetylglucosaminidase OS=Homo sapiens OX=9606 GN=ANAG PE=1 SV=2                                                        | Up         | 1.410894929 | 0.016542081 |
| 630  | spIP61201ICSN2_HUMAN  | COP9 signalosome complex subunit 2 OS=Homo sapiens OX=9606 GN=COPS2 PE=1 SV=1                                                  | Up         | 1.406412689 | 0.047161002 |
| 624  | spIQ6P996IPDXD1_HUMAN | Pyridoxal-dependent decarboxylase domain-containing protein 1 OS=Homo sapiens OX=9606 GN=PDXDC1 PE=1 SV=2                      | Up         | 1.394519397 | 0.03235304  |
| 1042 | spIQ81VF2IAHNK2_HUMAN | Protein AHNAK2 OS=Homo sapiens OX=9606 GN=AHNAK2 PE=1 SV=2                                                                     | Up         | 1.388240526 | 0.04199475  |
| 3007 | spIO00418IEF2K_HUMAN  | Eukaryotic elongation factor 2 kinase OS=Homo sapiens OX=9606 GN=EEF2K PE=1 SV=2                                               | Up         | 1.379687646 | 0.048226401 |



Table SI. Continued.

| N    | Accession              | Name                                                                                                                         | Diff_state | HCPB:HCP    | PVal        |
|------|------------------------|------------------------------------------------------------------------------------------------------------------------------|------------|-------------|-------------|
| 26   | spIP14625IENPL_HUMAN   | Endoplasmic reticulum protein 42 homolog OS=Homo sapiens OX=9606 GN=HSP90B1 PE=1 SV=1                                        | Up         | 1.377585848 | 0.000407895 |
| 148  | spIP19338INUCL_HUMAN   | Nucleolin OS=Homo sapiens OX=9606 GN=NCL PE=1 SV=3                                                                           | Up         | 1.374841886 | 0.01908857  |
| 1386 | spIQ86V/S8HOOOK3_HUMAN | Protein Hook homolog 3 OS=Homo sapiens OX=9606 GN=HOOK3 PE=1 SV=2                                                            | Up         | 1.365199124 | 0.04337601  |
| 696  | spIP62906IRL10A_HUMAN  | 60S ribosomal protein L10a OS=Homo sapiens OX=9606 GN=RPL10A PE=1 SV=2                                                       | Up         | 1.364892661 | 0.025782671 |
| 661  | spIP19623ISPEE_HUMAN   | Spermidine synthase OS=Homo sapiens OX=9606 GN=SRM PE=1 SV=1                                                                 | Up         | 1.360415478 | 0.0007288   |
| 1704 | spIP60953ICDC42_HUMAN  | Cell division control protein 42 homolog OS=Homo sapiens OX=9606 GN=CDC42 PE=1 SV=2                                          | Up         | 1.357240768 | 0.02080166  |
| 1099 | spIQ92791ISC65_HUMAN   | Endoplasmic reticulum protein SC65 OS=Homo sapiens OX=9606 GN=P3H4 PE=1 SV=1                                                 | Up         | 1.355841886 | 0.01126453  |
| 727  | spIP83731IRL24_HUMAN   | 60S ribosomal protein L24 OS=Homo sapiens OX=9606 GN=RPL24 PE=1 SV=1                                                         | Up         | 1.354730936 | 0.03129746  |
| 592  | spIP39019IRS19_HUMAN   | 40S ribosomal protein S19 OS=Homo sapiens OX=9606 GN=RPS19 PE=1 SV=2                                                         | Up         | 1.353304853 | 0.01100681  |
| 18   | spIQ92616GCN1_HUMAN    | eIF-2-alpha kinase activator GCN1 OS=Homo sapiens OX=9606 GN=GCN1 PE=1 SV=6                                                  | Up         | 1.346761647 | 0.01172209  |
| 201  | spIO75643IU520_HUMAN   | U5 small nuclear ribonucleoprotein 200 kDa helicase OS=Homo sapiens OX=9606 GN=SNRNP200 PE=1 SV=2                            | Up         | 1.343361936 | 0.01528325  |
| 133  | spIQ01518CAP1_HUMAN    | Adenylyl cyclase-associated protein 1 OS=Homo sapiens OX=9606 GN=CAP1 PE=1 SV=5                                              | Up         | 1.329666709 | 0.007179512 |
| 140  | spIQ86UP2IKTN1_HUMAN   | Kinectin OS=Homo sapiens OX=9606 GN=KTN1 PE=1 SV=1                                                                           | Up         | 1.311830818 | 0.033894941 |
| 27   | spIP49327IFAS_HUMAN    | Fatty acid synthase OS=Homo sapiens OX=9606 GN=FASN PE=1 SV=3                                                                | Up         | 1.311599651 | 0.005996005 |
| 117  | spIQ05682CALD1_HUMAN   | Caldesmon OS=Homo sapiens OX=9606 GN=CALD1 PE=1 SV=3                                                                         | Up         | 1.299915648 | 0.02183846  |
| 854  | spIQ92626PDXN_HUMAN    | Peroxidase homolog OS=Homo sapiens OX=9606 GN=PDXN PE=1 SV=2                                                                 | Up         | 1.296683467 | 0.030009661 |
| 1025 | spIQ2M389WASC4_HUMAN   | WASH complex subunit 4 OS=Homo sapiens OX=9606 GN=WASHC4 PE=1 SV=2                                                           | Up         | 1.287812076 | 0.01567287  |
| 217  | spIP48643TCPE_HUMAN    | T-complex protein 1 subunit epsilon OS=Homo sapiens OX=9606 GN=CCT5 PE=1 SV=1                                                | Up         | 1.281729168 | 0.041799322 |
| 149  | spIQ96AY3IFKB10_HUMAN  | Peptidyl-prolyl cis-trans isomerase FKBP10 OS=Homo sapiens OX=9606 GN=FKBP10 PE=1 SV=1                                       | Up         | 1.278498225 | 0.003126384 |
| 59   | spIO43707ACTN4_HUMAN   | Alpha-actinin-4 OS=Homo sapiens OX=9606 GN=ACTN4 PE=1 SV=2                                                                   | Up         | 1.27833742  | 0.007888998 |
| 1953 | spIP25787IPSA2_HUMAN   | Proteasome subunit alpha type-2 OS=Homo sapiens OX=9606 GN=PSMA2 PE=1 SV=2                                                   | Up         | 1.268688264 | 0.03727863  |
| 318  | spIA5YKK6CNOT1_HUMAN   | CCR4-NOT transcription complex subunit 1 OS=Homo sapiens OX=9606 GN=CNOT1 PE=1 SV=2                                          | Up         | 1.260855885 | 0.016391929 |
| 204  | spIQ14789GOGB1_HUMAN   | Golgin subfamily B member 1 OS=Homo sapiens OX=9606 GN=GOLGB1 PE=1 SV=2                                                      | Up         | 1.255785962 | 0.00285461  |
| 902  | spIQ13439GOGA4_HUMAN   | Golgin subfamily A member 4 OS=Homo sapiens OX=9606 GN=GOLGA4 PE=1 SV=1                                                      | Up         | 1.255523644 | 0.033196341 |
| 828  | spIP55263ADK_HUMAN     | Adenosine kinase OS=Homo sapiens OX=9606 GN=ADK PE=1 SV=2                                                                    | Up         | 1.250768809 | 0.031422041 |
| 810  | spIQ9BTV4TMM43_HUMAN   | Transmembrane protein 43 OS=Homo sapiens OX=9606 GN=TMEM43 PE=1 SV=1                                                         | Up         | 1.250640042 | 0.030776629 |
| 426  | spIQ13263ITIF1B_HUMAN  | Transcription intermediary factor 1-beta OS=Homo sapiens OX=9606 GN=TRIM28 PE=1 SV=5                                         | Up         | 1.250350957 | 0.02829024  |
| 73   | spIP36578IRL4_HUMAN    | 60S ribosomal protein L4 OS=Homo sapiens OX=9606 GN=RPL4 PE=1 SV=5                                                           | Up         | 1.249310758 | 0.045947392 |
| 2191 | spIQ81VD9INUDC3_HUMAN  | NudC domain-containing protein 3 OS=Homo sapiens OX=9606 GN=NUDC3 PE=1 SV=3                                                  | Up         | 1.243854659 | 0.047554851 |
| 213  | spIP27797ICALR_HUMAN   | Calreticulin OS=Homo sapiens OX=9606 GN=CALR PE=1 SV=1                                                                       | Up         | 1.236653072 | 0.01005375  |
| 270  | spIO60716CTND1_HUMAN   | Catenin delta-1 OS=Homo sapiens OX=9606 GN=CTNND1 PE=1 SV=1                                                                  | Up         | 1.230000929 | 0.04548154  |
| 684  | spIQ16543CDC37_HUMAN   | Hsp90 co-chaperone Cdc37 OS=Homo sapiens OX=9606 GN=CDC37 PE=1 SV=1                                                          | Up         | 1.229627845 | 0.048625961 |
| 354  | spIO14617AP3D1_HUMAN   | AP-3 complex subunit delta-1 OS=Homo sapiens OX=9606 GN=AP3D1 PE=1 SV=1                                                      | Up         | 1.227797321 | 0.03018919  |
| 900  | spIQ14738I2A5D_HUMAN   | Serine/threonine-protein phosphatase 2A 56 kDa regulatory subunit delta isoform OS=Homo sapiens OX=9606 GN=PPP2R5D PE=1 SV=1 | Up         | 1.225416417 | 0.030867061 |
| 730  | spIQ9NPNQ8IRIC8A_HUMAN | Synembryn-A OS=Homo sapiens OX=9606 GN=RIC8A PE=1 SV=3                                                                       | Up         | 1.221058346 | 0.02866959  |

Table SI. Continued.

| N    | Accession              | Name                                                                                                                    | Diff_state | HCPB:HCP     | PVal        |
|------|------------------------|-------------------------------------------------------------------------------------------------------------------------|------------|--------------|-------------|
| 11   | spIQ13813 SPTN1_HUMAN  | Spectrin alpha chain, non-erythrocytic 1 OS=Homo sapiens OX=9606 GN=SPTAN1 PE=1 SV=3                                    | Up         | 1.220554862  | 0.024515459 |
| 84   | spIQ99715 COCA1_HUMAN  | Collagen alpha-1(XII) chain OS=Homo sapiens OX=9606 GN=COL12A1 PE=1 SV=2                                                | Up         | 1.219441266  | 0.02711351  |
| 2524 | spIP533651 ARFP2_HUMAN | Arfapin-2 OS=Homo sapiens OX=9606 GN=ARFP2 PE=1 SV=1                                                                    | Up         | 1.203459989  | 0.042112019 |
| 139  | spIQ03001 DYST_HUMAN   | Dystonin OS=Homo sapiens OX=9606 GN=DST PE=1 SV=4                                                                       | Up         | 1.203192743  | 0.024048399 |
| 971  | spIO75962 TRIO_HUMAN   | Triple functional domain protein OS=Homo sapiens OX=9606 GN=TRIO PE=1 SV=2                                              | Up         | 1.201366187  | 0.0413162   |
| 223  | spIQ12884 SEPR_HUMAN   | Prolyl endopeptidase FAP OS=Homo sapiens OX=9606 GN=FAP PE=1 SV=5                                                       | Up         | 1.200380125  | 0.018629789 |
| 559  | spIQ9UP95 S12A4_HUMAN  | Solute carrier family 12 member 4 OS=Homo sapiens OX=9606 GN=SLC12A4 PE=1 SV=2                                          | Down       | 0.828646705  | 0.041236881 |
| 1034 | spIP35555 FBN1_HUMAN   | Fibrillin-1 OS=Homo sapiens OX=9606 GN=FBN1 PE=1 SV=3                                                                   | Down       | 0.828494725  | 0.033419192 |
| 101  | spIP05023 AT1A1_HUMAN  | Sodium/potassium-transporting ATPase subunit alpha-1 OS=Homo sapiens OX=9606 GN=ATP1A1 PE=1 SV=1                        | Down       | 0.825284292  | 0.02574705  |
| 175  | spIP26599 PTBP1_HUMAN  | Polypyrimidine tract-binding protein 1 OS=Homo sapiens OX=9606 GN=PTBP1 PE=1 SV=1                                       | Down       | 0.822827182  | 0.001620211 |
| 1627 | spIP52788 SPSY_HUMAN   | Spermine synthase OS=Homo sapiens OX=9606 GN=SMS PE=1 SV=2                                                              | Down       | 0.817766528  | 0.043719601 |
| 3023 | spIQ14257 RCN2_HUMAN   | Reticulocalbin-2 OS=Homo sapiens OX=9606 GN=RCN2 PE=1 SV=1                                                              | Down       | 0.812431629  | 0.01081681  |
| 536  | spIO75367 H2AY_HUMAN   | Core histone macro-H2A.1 OS=Homo sapiens OX=9606 GN=H2AFY PE=1 SV=4                                                     | Down       | 0.811171052  | 0.03356519  |
| 757  | spIQ66K74 MAPIS_HUMAN  | Microtubule-associated protein 1S OS=Homo sapiens OX=9606 GN=MAP1S PE=1 SV=2                                            | Down       | 0.803105237  | 0.0133419   |
| 994  | spIP61764 STXB1_HUMAN  | Syntaxin-binding protein 1 OS=Homo sapiens OX=9606 GN=STXBP1 PE=1 SV=1                                                  | Down       | 0.800549445  | 0.028669611 |
| 182  | spIQ04446 GLGB_HUMAN   | 1,4-alpha-glucan-branching enzyme OS=Homo sapiens OX=9606 GN=GBE1 PE=1 SV=3                                             | Down       | 0.778293615  | 0.032069299 |
| 1258 | spIQ9Y2D4 EXC6B_HUMAN  | Exocyst complex component 6B OS=Homo sapiens OX=9606 GN=EXOC6B PE=1 SV=3                                                | Down       | 0.77601281   | 0.036976151 |
| 1601 | spIQ05397 FAK1_HUMAN   | Focal adhesion kinase 1 OS=Homo sapiens OX=9606 GN=PTK2 PE=1 SV=2                                                       | Down       | 0.770786271  | 0.01284171  |
| 370  | spIP49419 AL7A1_HUMAN  | Alpha-aminoadipic semialdehyde dehydrogenase OS=Homo sapiens OX=9606 GN=ALDH7A1 PE=1 SV=5                               | Down       | 0.766736089  | 0.041004691 |
| 425  | spIP12110 CO6A2_HUMAN  | Collagen alpha-2(VI) chain OS=Homo sapiens OX=9606 GN=COL6A2 PE=1 SV=4                                                  | Down       | 0.7663318562 | 0.02045789  |
| 1146 | spIO95865 DDAH2_HUMAN  | N(G),N(G)-dimethylarginine dimethylaminohydrolase 2 OS=Homo sapiens OX=9606 GN=DDAH2 PE=1 SV=1                          | Down       | 0.755064471  | 0.008883956 |
| 778  | spIQ16795 INDUA9_HUMAN | NADH dehydrogenase [ubiquinone] 1 alpha subcomplex subunit 9, mitochondrial OS=Homo sapiens OX=9606 GN=NDUFA9 PE=1 SV=2 | Down       | 0.751833224  | 0.017163871 |
| 302  | spIP61978 HNRPK_HUMAN  | Heterogeneous nuclear ribonucleoprotein K OS=Homo sapiens OX=9606 GN=HNRNPK PE=1 SV=1                                   | Down       | 0.747737007  | 0.009556236 |
| 1980 | spIO95248 MTMR5_HUMAN  | Myotubularin-related protein 5 OS=Homo sapiens OX=9606 GN=SBF1 PE=1 SV=4                                                | Down       | 0.747549262  | 0.018098241 |
| 212  | spIP50570 IDYN2_HUMAN  | Dynamin-2 OS=Homo sapiens OX=9606 GN=DNM2 PE=1 SV=2                                                                     | Down       | 0.742275834  | 0.021181529 |
| 228  | spIP06737 PYGL_HUMAN   | Glycogen phosphorylase, liver form OS=Homo sapiens OX=9606 GN=PYGL PE=1 SV=4                                            | Down       | 0.742184256  | 0.036317188 |
| 1308 | spIO96005 CLPT1_HUMAN  | Cleft lip and palate transmembrane protein 1 OS=Homo sapiens OX=9606 GN=CLPTM1 PE=1 SV=1                                | Down       | 0.735094017  | 0.048695281 |
| 248  | spIP54289 CA2D1_HUMAN  | Voltage-dependent calcium channel subunit alpha-2/delta-1 OS=Homo sapiens OX=9606 GN=CACNA2D1 PE=1 SV=3                 | Down       | 0.734049707  | 0.038661439 |
| 153  | spIP17301 ITGA2_HUMAN  | Integrin alpha-2 OS=Homo sapiens OX=9606 GN=ITGA2 PE=1 SV=1                                                             | Down       | 0.722252208  | 0.003761852 |
| 1409 | spIP61224 RAP1B_HUMAN  | Ras-related protein Rap-1b OS=Homo sapiens OX=9606 GN=RAP1B PE=1 SV=1                                                   | Down       | 0.720913554  | 0.04187509  |

Table SI. Continued.

| N    | Accession             | Name                                                                                                                                               | Diff_state | HCPB:HCP    | PVal        |
|------|-----------------------|----------------------------------------------------------------------------------------------------------------------------------------------------|------------|-------------|-------------|
| 636  | spIQ16698IDECR_HUMAN  | 2,4-dienoyl-CoA reductase, mitochondrial OS=Homo sapiens OX=9606 GN=DECR1 PE=1 SV=1                                                                | Down       | 0.715655176 | 0.03745351  |
| 127  | spIP29401ITKT_HUMAN   | Transketolase OS=Homo sapiens OX=9606 GN=TKT PE=1 SV=3                                                                                             | Down       | 0.714398976 | 0.008716368 |
| 123  | spIP49748IACADV_HUMAN | Very long-chain specific acyl-CoA dehydrogenase, mitochondrial OS=Homo sapiens OX=9606 GN=ACADV PE=1 SV=1                                          | Down       | 0.706951574 | 0.04104675  |
| 552  | spIP33121IACSL1_HUMAN | Long-chain-fatty-acid--CoA ligase 1 OS=Homo sapiens OX=9606 GN=ACSL1 PE=1 SV=1                                                                     | Down       | 0.70271212  | 0.032487448 |
| 9    | spIO75369FLNB_HUMAN   | Filamin-B OS=Homo sapiens OX=9606 GN=FLNB PE=1 SV=2                                                                                                | Down       | 0.689130182 | 0.00069779  |
| 216  | spIP40926IMDHM_HUMAN  | Malate dehydrogenase, mitochondrial OS=Homo sapiens OX=9606 GN=MDH2 PE=1 SV=3                                                                      | Down       | 0.681597134 | 0.01040755  |
| 1347 | spIP42858IHD_HUMAN    | Huntingtin OS=Homo sapiens OX=9606 GN=HTT PE=1 SV=2                                                                                                | Down       | 0.679696007 | 0.040824689 |
| 191  | spIP55084IECHB_HUMAN  | Trifunctional enzyme subunit beta, mitochondrial OS=Homo sapiens OX=9606 GN=HADHB PE=1 SV=3                                                        | Down       | 0.672400539 | 0.041818019 |
| 579  | spIP10515IODP2_HUMAN  | Dihydrolipoyllysine-residue acetyltransferase component of pyruvate dehydrogenase complex, mitochondrial OS=Homo sapiens OX=9606 GN=DLAT PE=1 SV=3 | Down       | 0.671204686 | 0.043124892 |
| 764  | spIQ9UIJ7IKAD3_HUMAN  | GTP:AMP phosphotransferase AK3, mitochondrial OS=Homo sapiens OX=9606 GN=AK3 PE=1 SV=4                                                             | Down       | 0.66954718  | 0.01598284  |
| 1682 | spIQ9NX40IOCAD1_HUMAN | OCIA domain-containing protein 1 OS=Homo sapiens OX=9606 GN=OCIAD1 PE=1 SV=1                                                                       | Down       | 0.656914825 | 0.043602511 |
| 606  | spIP04040ICATA_HUMAN  | Catalase OS=Homo sapiens OX=9606 GN=CAT PE=1 SV=3                                                                                                  | Down       | 0.65574076  | 0.0304559   |
| 1446 | spIQ9Y3A6ITMED5_HUMAN | Transmembrane emp24 domain-containing protein 5 OS=Homo sapiens OX=9606 GN=TMED5 PE=1 SV=1                                                         | Down       | 0.654017629 | 0.030291829 |
| 93   | spIQ13423INNTM_HUMAN  | NAD(P) transhydrogenase, mitochondrial OS=Homo sapiens OX=9606 GN=NNT PE=1 SV=3                                                                    | Down       | 0.652299474 | 0.000257968 |
| 37   | spIP15144IAMPN_HUMAN  | Aminopeptidase N OS=Homo sapiens OX=9606 GN=ANPEP PE=1 SV=4                                                                                        | Down       | 0.649026639 | 1.98884E-05 |
| 1200 | spIQ93034CUL5_HUMAN   | Cullin-5 OS=Homo sapiens OX=9606 GN=CUL5 PE=1 SV=4                                                                                                 | Down       | 0.6448301   | 0.02196818  |
| 277  | spIQ99798IACON_HUMAN  | Aconitate hydratase, mitochondrial OS=Homo sapiens OX=9606 GN=ACO2 PE=1 SV=2                                                                       | Down       | 0.641964174 | 0.006885001 |
| 275  | spIP39023IRL3_HUMAN   | 60S ribosomal protein L3 OS=Homo sapiens OX=9606 GN=RPL3 PE=1 SV=2                                                                                 | Down       | 0.632711331 | 0.00639711  |
| 521  | spIP42765ITHIM_HUMAN  | 3-ketoacyl-CoA thiolase, mitochondrial OS=Homo sapiens OX=9606 GN=ACAA2 PE=1 SV=2                                                                  | Down       | 0.628063772 | 0.01288115  |
| 390  | spIP07858ICATB_HUMAN  | Cathepsin B OS=Homo sapiens OX=9606 GN=CTSB PE=1 SV=3                                                                                              | Down       | 0.615159574 | 0.023609851 |
| 33   | spIP00558IPGK1_HUMAN  | Phosphoglycerate kinase 1 OS=Homo sapiens OX=9606 GN=PGK1 PE=1 SV=3                                                                                | Down       | 0.614921582 | 6.20649E-05 |
| 776  | spIP17813IEGLN_HUMAN  | Endoglin OS=Homo sapiens OX=9606 GN=ENG PE=1 SV=2                                                                                                  | Down       | 0.611929559 | 0.006312106 |
| 1266 | spIO14558IHSPB6_HUMAN | Heat shock protein beta-6 OS=Homo sapiens OX=9606 GN=HSPB6 PE=1 SV=2                                                                               | Down       | 0.606374003 | 0.025080189 |
| 649  | spIQ10472IGALT1_HUMAN | Polypeptide N-acetylgalactosaminyltransferase 1 OS=Homo sapiens OX=9606 GN=GALNT1 PE=1 SV=1                                                        | Down       | 0.580879021 | 0.01895107  |
| 1626 | spIQ92878IRAD50_HUMAN | DNA repair protein RAD50 OS=Homo sapiens OX=9606 GN=RAD50 PE=1 SV=1                                                                                | Down       | 0.575876441 | 0.03379932  |
| 1819 | spIP62330IARF6_HUMAN  | ADP-ribosylation factor 6 OS=Homo sapiens OX=9606 GN=ARF6 PE=1 SV=2                                                                                | Down       | 0.572688571 | 0.041119192 |
| 1881 | spIO14786INRPI_HUMAN  | Neuropilin-1 OS=Homo sapiens OX=9606 GN=NRPI PE=1 SV=3                                                                                             | Down       | 0.572507045 | 0.01087937  |
| 25   | spIQ07954ILRP1_HUMAN  | Prolow-density lipoprotein receptor-related protein 1 OS=Homo sapiens OX=9606 GN=LRP1 PE=1 SV=2                                                    | Down       | 0.566503016 | 0.00040199  |
| 16   | spIP04406IG3P_HUMAN   | Glyceraldehyde-3-phosphate dehydrogenase OS=Homo sapiens OX=9606 GN=GAPDH PE=1 SV=3                                                                | Down       | 0.557691572 | 0.01724715  |
| 998  | spIP04179ISODM_HUMAN  | Superoxide dismutase [Mn], mitochondrial OS=Homo sapiens OX=9606 GN=SOD2 PE=1 SV=3                                                                 | Down       | 0.538427089 | 0.03092055  |

Table SI. Continued.

| N    | Accession             | Name                                                                                                            | Diff_state | HCPB:HCP    | PVal        |
|------|-----------------------|-----------------------------------------------------------------------------------------------------------------|------------|-------------|-------------|
| 68   | sp P42224 STAT1_HUMAN | Signal transducer and activator of transcription 1 -alpha/beta OS=Homo sapiens OX=9606 GN=STAT1 PE=1 SV=2       | Down       | 0.536825199 | 0.001553878 |
| 413  | sp Q9UBG0 MRC2_HUMAN  | C-type mannose receptor 2 OS=Homo sapiens OX=9606 GN=MRC2 PE=1 SV=2                                             | Down       | 0.52889347  | 0.017194049 |
| 478  | sp Q96CX2 KCD12_HUMAN | BTB/POZ domain-containing protein KCD12 OS=Homo sapiens OX=9606 GN=KCD12 PE=1 SV=1                              | Down       | 0.518821781 | 0.002300407 |
| 64   | sp P11216 PYGB_HUMAN  | Glycogen phosphorylase, brain form OS=Homo sapiens OX=9606 GN=PYGB PE=1 SV=5                                    | Down       | 0.507987954 | 0.008311799 |
| 1231 | sp P51688 SPHM_HUMAN  | N-sulphoglucosamine sulphohydrolase OS=Homo sapiens OX=9606 GN=SGSH PE=1 SV=1                                   | Down       | 0.488864437 | 0.037516709 |
| 515  | sp Q9UKX5 ITA11_HUMAN | Integrin alpha-11 OS=Homo sapiens OX=9606 GN=ITGA11 PE=1 SV=2                                                   | Down       | 0.47160752  | 0.040472809 |
| 272  | sp Q06830 PRDX1_HUMAN | Peroxiredoxin-1 OS=Homo sapiens OX=9606 GN=PRDX1 PE=1 SV=1                                                      | Down       | 0.47021025  | 0.01485253  |
| 169  | sp P21589 5NTD_HUMAN  | 5'-nucleotidase OS=Homo sapiens OX=9606 GN=NT5E PE=1 SV=1                                                       | Down       | 0.442680425 | 2.06411E-05 |
| 493  | sp Q15582 BGH3_HUMAN  | Transforming growth factor-beta-induced protein ig-h3 OS=Homo sapiens OX=9606 GN=TGFB1 PE=1 SV=1                | Down       | 0.439233365 | 0.003950913 |
| 54   | sp O00469 PLOD2_HUMAN | Procollagen-lysine,2-oxoglutarate 5-dioxygenase 2 OS=Homo sapiens OX=9606 GN=PLOD2 PE=1 SV=2                    | Down       | 0.434508559 | 0.000453347 |
| 901  | sp Q6YHK3 CD109_HUMAN | CD109 antigen OS=Homo sapiens OX=9606 GN=CD109 PE=1 SV=2                                                        | Down       | 0.421369251 | 0.000102637 |
| 1466 | sp P24821 ITENA_HUMAN | Tenascin OS=Homo sapiens OX=9606 GN=TNCP PE=1 SV=3                                                              | Down       | 0.421346163 | 0.003139075 |
| 221  | sp P07093 IGDN_HUMAN  | Glia-derived nexin OS=Homo sapiens OX=9606 GN=SERPINE2 PE=1 SV=1                                                | Down       | 0.407478093 | 0.01446738  |
| 60   | sp P00338 ILDHA_HUMAN | L-lactate dehydrogenase A chain OS=Homo sapiens OX=9606 GN=LDHA PE=1 SV=2                                       | Down       | 0.402261236 | 6.07534E-05 |
| 10   | sp P12111 CO6A3_HUMAN | Collagen alpha-3(VI) chain OS=Homo sapiens OX=9606 GN=COL6A3 PE=1 SV=5                                          | Down       | 0.360335225 | 3.73646E-06 |
| 1175 | sp Q9Y6C2 EMIL1_HUMAN | EMILIN-1 OS=Homo sapiens OX=9606 GN=EMILIN1 PE=1 SV=3                                                           | Down       | 0.360267129 | 0.01133484  |
| 1007 | sp P98160 PGBM_HUMAN  | Basement membrane-specific heparan sulfate proteoglycan core protein OS=Homo sapiens OX=9606 GN=HSPG2 PE=1 SV=4 | Down       | 0.342047984 | 0.000730608 |
| 2688 | sp Q8N3P4 VPS8_HUMAN  | Vacuolar protein sorting-associated protein 8 homolog OS=Homo sapiens OX=9606 GN=VPS8 PE=1 SV=3                 | Down       | 0.325993612 | 0.01259269  |
| 23   | sp P02751 FINC_HUMAN  | Fibronectin OS=Homo sapiens OX=9606 GN=FN1 PE=1 SV=4                                                            | Down       | 0.307032103 | 5.72E-12    |
| 363  | sp P20591 MX1_HUMAN   | Interferon-induced GTP-binding protein Mx1 OS=Homo sapiens OX=9606 GN=MX1 PE=1 SV=4                             | Down       | 0.289555963 | 0.002112777 |
| 520  | sp P09601 HMOX1_HUMAN | Heme oxygenase 1 OS=Homo sapiens OX=9606 GN=HMOX1 PE=1 SV=1                                                     | Down       | 0.280689607 | 0.000114466 |
| 1106 | sp P02768 ALBU_HUMAN  | Serum albumin OS=Homo sapiens OX=9606 GN=ALB PE=1 SV=2                                                          | Down       | 0.162563379 | 0.03988342  |
